# Supplementary material for: Optimized synthesis and crystal growth by sublimation of 1,3,3-trichloroisoindolenines, key building blocks for crosswise phthalocyanines
Source: Royal Society of Chemistry journal article supplement (doi:10.1039/c4ce00189c), 2014-01-01
Supplement: c4ce00189c1.pdf [file c4ce00189c1.pdf]

# Optimized synthesis and crystal growth by sublimation of 1,3,3-trichloroisoindolenines, key building blocks for crosswise phthalocyanines<sup>†</sup>

Mehmet Menaf Ayhan, Yunus Zorlu, Özlem Gökdemir, Ayşe Gül Gürek, Fabienne Dumoulin,\*

Vefa Ahsen and Catherine Hirel\*

*Department of Chemistry, Gebze Institute of Technology, P. O. Box 141, 41400 Gebze Kocaeli, Turkey. Fax: +90 262 605 31 05; Tel: +90 262 605 30 22. E-mails: [fdumoulin@gyte.edu.tr](mailto:fdumoulin@gyte.edu.tr); [chirel@gyte.edu.tr](mailto:chirel@gyte.edu.tr)*

<sup>†</sup>In the memory of Christian Claessens

## Contents

**Table S1.** Intermolecular interactions in **1** and **2**

**Table S1.** Intermolecular interactions in **1** and **2**

| Compound | $\pi \cdots \pi$ interactions    |               |                                 |                                   |
|----------|----------------------------------|---------------|---------------------------------|-----------------------------------|
|          | Cg(i) $\cdots$ Cg(j)             | Symmetry      | Beta ( $^\circ$ )               | $\pi \cdots \pi$ ( $\text{\AA}$ ) |
| <b>1</b> | Cg1 $\cdots$ Cg1                 | 1-x,-1/2+y,-z | 47.09                           | 5.0861(9)                         |
|          | Cg1 $\cdots$ Cg2                 | 1-x,-1/2+y,-z | 31.47                           | 4.0604(7)                         |
|          | Cg2 $\cdots$ Cg2                 | 1-x,-1/2+y,-z | 32.42                           | 4.1026(7)                         |
| <b>2</b> | Cg1 $\cdots$ Cg1                 | -x,-1/2+y,-z  | 51.08                           | 5.6568(17)                        |
|          | Cg1 $\cdots$ Cg2                 | -x,-1/2+y,1-z | 52.36                           | 5.8193(17)                        |
|          | Cg2 $\cdots$ Cg2                 | -x,-1/2+y,1-z | 35.16                           | 4.3472(12)                        |
|          | C-Cl $\cdots$ $\pi$ interactions |               |                                 |                                   |
|          | C-Cl $\cdots$ Cg(i)              | Symmetry      | Cl $\cdots$ Cg ( $\text{\AA}$ ) | Y-X $\cdots$ Cg( $^\circ$ )       |
| <b>2</b> | C8-Cl2 $\cdots$ Cg1              | -x,-1/2+y,-z  | 3.996(9)                        | 110.21(5)                         |
|          | C3-Cl3 $\cdots$ Cg2              | -x,-1/2+y,1-z | 3.6242(5)                       | 80.16(3)                          |
|          | C=N $\cdots$ Cl interactions     |               |                                 |                                   |
|          | C-N $\cdots$ Cl                  | Symmetry      | N $\cdots$ Cl ( $\text{\AA}$ )  | C-N $\cdots$ Cl ( $^\circ$ )      |
| <b>2</b> | C7-N1 $\cdots$ Cl4               | x, y, -1+z    | 3.170(3)                        | 143.3(2)                          |

For both compounds, Cg1 and Cg2 are the centroids of the rings (N1/C7/C6/C1/C8) and (C1-C6), respectively. Beta: Angle between the planes; Cg-Cg: distance between ring centroids
